# Supplementary material for: A Minimalist Model of Salt-Marsh Vegetation Dynamics Driven by Species Competition and Dispersal
Source: Frontiers journal article supplement (doi:10.3389/fmars.2022.866570), 2022-04-05
Supplement: Table_1.XLSX [file Table_1.XLSX]

## Sheet: Foglio1
Sim.	Param.of interest	Initial vegetation distribution	Habitat Quality		Compet.	Mortality	Fertility	Kernel size
					ability	rate	rate
			z0 [cm]	k [m-1]	δMIN [-]	μ0	φ [days-1]	D-1 [m]
						[days-1]
REF	\	Random	[5,10,15,20]	[90,90,90,90]	1	5·10-3	102	1
IVD1	\	Bare soil	[5,10,15,20]	[90,90,90,90]	1	5·10-3	102	1
IVD2	\	Figure 2c	[5,10,15,20]	[90,90,90,90]	1	5·10-3	102	1
HQF1	z0	Random	[-5,0,5,10]	[90,90,90,90]	1	5·10-3	102	1
HQF2	z0	Random	[0,5,10,15]	[90,90,90,90]	1	5·10-3	102	1
HQF3	z0	Random	[10,15,20,25]	[90,90,90,90]	1	5·10-3	102	1
HQF4	z0	Random	[15,20,25,30]	[90,90,90,90]	1	5·10-3	102	1
HQF5	k	Random	[5,10,15,20]	[5,30,60,90]	1	5·10-3	102	1
HQF6	k	Random	[5,10,15,20]	[30,50,70,90]	1	5·10-3	102	1
HQF7	k	Random	[5,10,15,20]	[90,70,50,30]	1	5·10-3	102	1
HQF8	k	Random	[5,10,15,20]	[90,60,30,5]	1	5·10-3	102	1
ICA1	δMIN	Random	[5,10,15,20]	[90,90,90,90]	0.75	5·10-3	102	1
ICA2	δMIN	Random	[5,10,15,20]	[90,90,90,90]	0.5	5·10-3	102	1
ICA3	δMIN	Random	[5,10,15,20]	[90,90,90,90]	0.25	5·10-3	102	1
ICA4	δMIN	Random	[5,10,15,20]	[90,90,90,90]	0.01	5·10-3	102	1
BMR1	μ0	Random	[5,10,15,20]	[90,90,90,90]	1	5·10-1	102	1
BMR2	μ0	Random	[5,10,15,20]	[90,90,90,90]	1	5·10-2	102	1
BMR3	μ0	Random	[5,10,15,20]	[90,90,90,90]	1	5·10-4	102	1
BMR4	μ0	Random	[5,10,15,20]	[90,90,90,90]	1	5·10-5	102	1
VFR1	ϕ	Random	[5,10,15,20]	[90,90,90,90]	1	5·10-3	100	1
VFR2	ϕ	Random	[5,10,15,20]	[90,90,90,90]	1	5·10-3	101	1
VFR3	ϕ	Random	[5,10,15,20]	[90,90,90,90]	1	5·10-3	103	1
VFR4	ϕ	Random	[5,10,15,20]	[90,90,90,90]	1	5·10-3	104	1
DKS1	D-1	Random	[5,10,15,20]	[90,90,90,90]	1	5·10-3	102	0.1
DKS2	D-1	Random	[5,10,15,20]	[90,90,90,90]	1	5·10-3	102	0.5
DKS3	D-1	Random	[5,10,15,20]	[90,90,90,90]	1	5·10-3	102	1.5
DKS4	D-1	Random	[5,10,15,20]	[90,90,90,90]	1	5·10-3	102	10
